# Supplementary material for: MPR 1.0: a stand-alone multiscale parameter regionalization tool for improved parameter estimation of land surface models
Source: Copernicus journal article supplement (doi:10.5194/gmd-15-859-2022), 2022-01-31
Supplement: Supplementary file [file gmd-15-859-2022-supplement-title-page.pdf › gmd-15-859-2022-supplement-title-page.pdf]

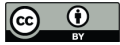

## *Supplement of*

# **MPR 1.0: a stand-alone multiscale parameter regionalization tool for improved parameter estimation of land surface models**

**Robert Schweppe et al.**

*Correspondence to:* Stephan Thober ([stephan.thober@ufz.de](mailto:stephan.thober@ufz.de))

- [gmd-15-859-2022-supplement-title-page.pdf](#)
- [CONUS\\_NoahMP\\_mpr.nml](#)
- [FLORIDA\\_R02B05\\_Weynants\\_mpr.nml](#)
- [Mississippi\\_HTESSEL\\_hypres\\_mpr.nml](#)
- [Mississippi\\_HTESSEL\\_toth\\_mpr.nml](#)
- [Mississippi\\_HTESSEL\\_zacharias\\_mpr.nml](#)
- [Netherlands\\_EU\\_SoilHydroGrids\\_mpr.nml](#)
- [template\\_mHM\\_mpr.nml](#)

The copyright of individual parts of the supplement might differ from the article licence.
